# Supplementary material
Source: publisher figshare collection journal article supplement (https://gsajournals.figshare.com/articles/dataset/_/8031848)
Supplement: Supplementary file 1 [file 1]

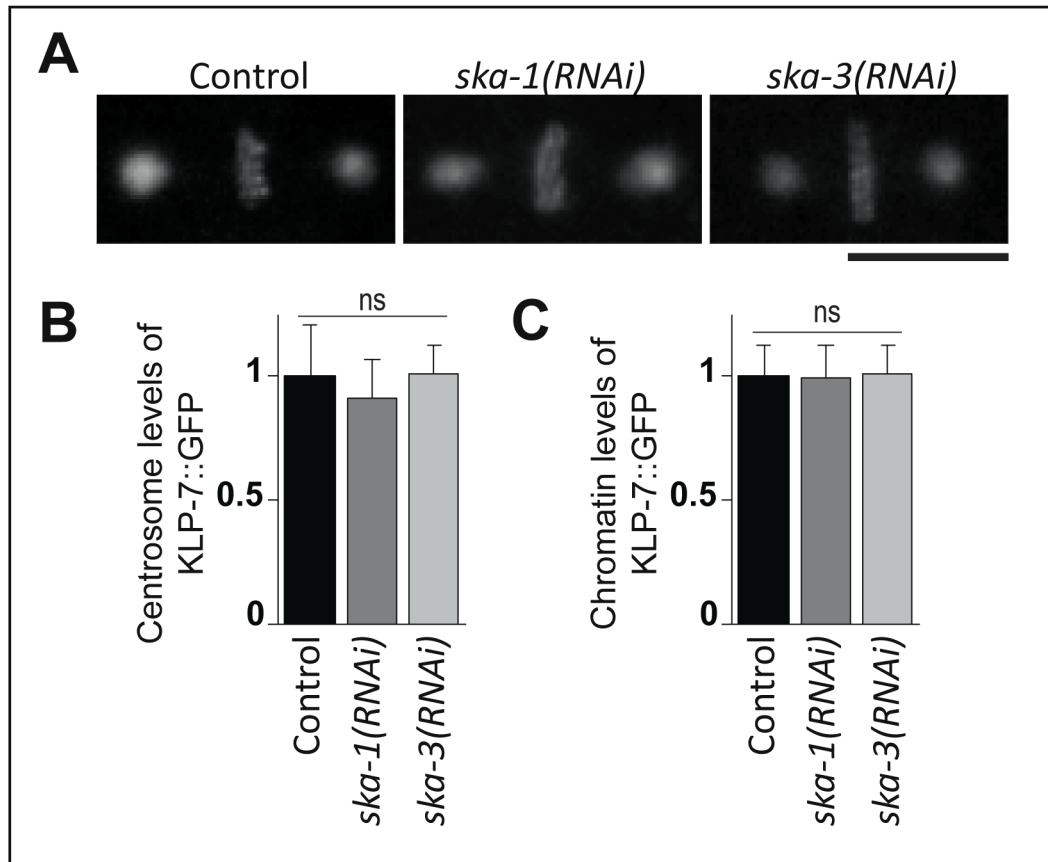

**Figure S2. KLP-7 kinesin-13 microtubule depolymerase levels are not obviously affected by Ska depletion**

A) Representative one-cell metaphase embryos expressing KLP-7::GFP were imaged; metaphase spindles are shown. KLP-7 was observed on centrosomes and kinetochores. Scale bar is 10  $\mu$ m.

B) Quantification of KLP-7::GFP at the centrosome normalized to control (n=10). *ska-1* (n=10) and *ska-3* (n=11) RNAi treatment did not alter KLP-7 levels at the centrosome.

C) Quantification of KLP-7::GFP at kinetochores normalized to control embryos (n=10). *ska-1* (n=10) and *ska-3* (n=11) RNAi treatment did not alter KLP-7 levels at the kinetochores.
