# Supplementary material
Source: publisher figshare collection journal article supplement (https://gsajournals.figshare.com/articles/dataset/_/8031848)
Supplement: Supplementary file 2 [file 1]

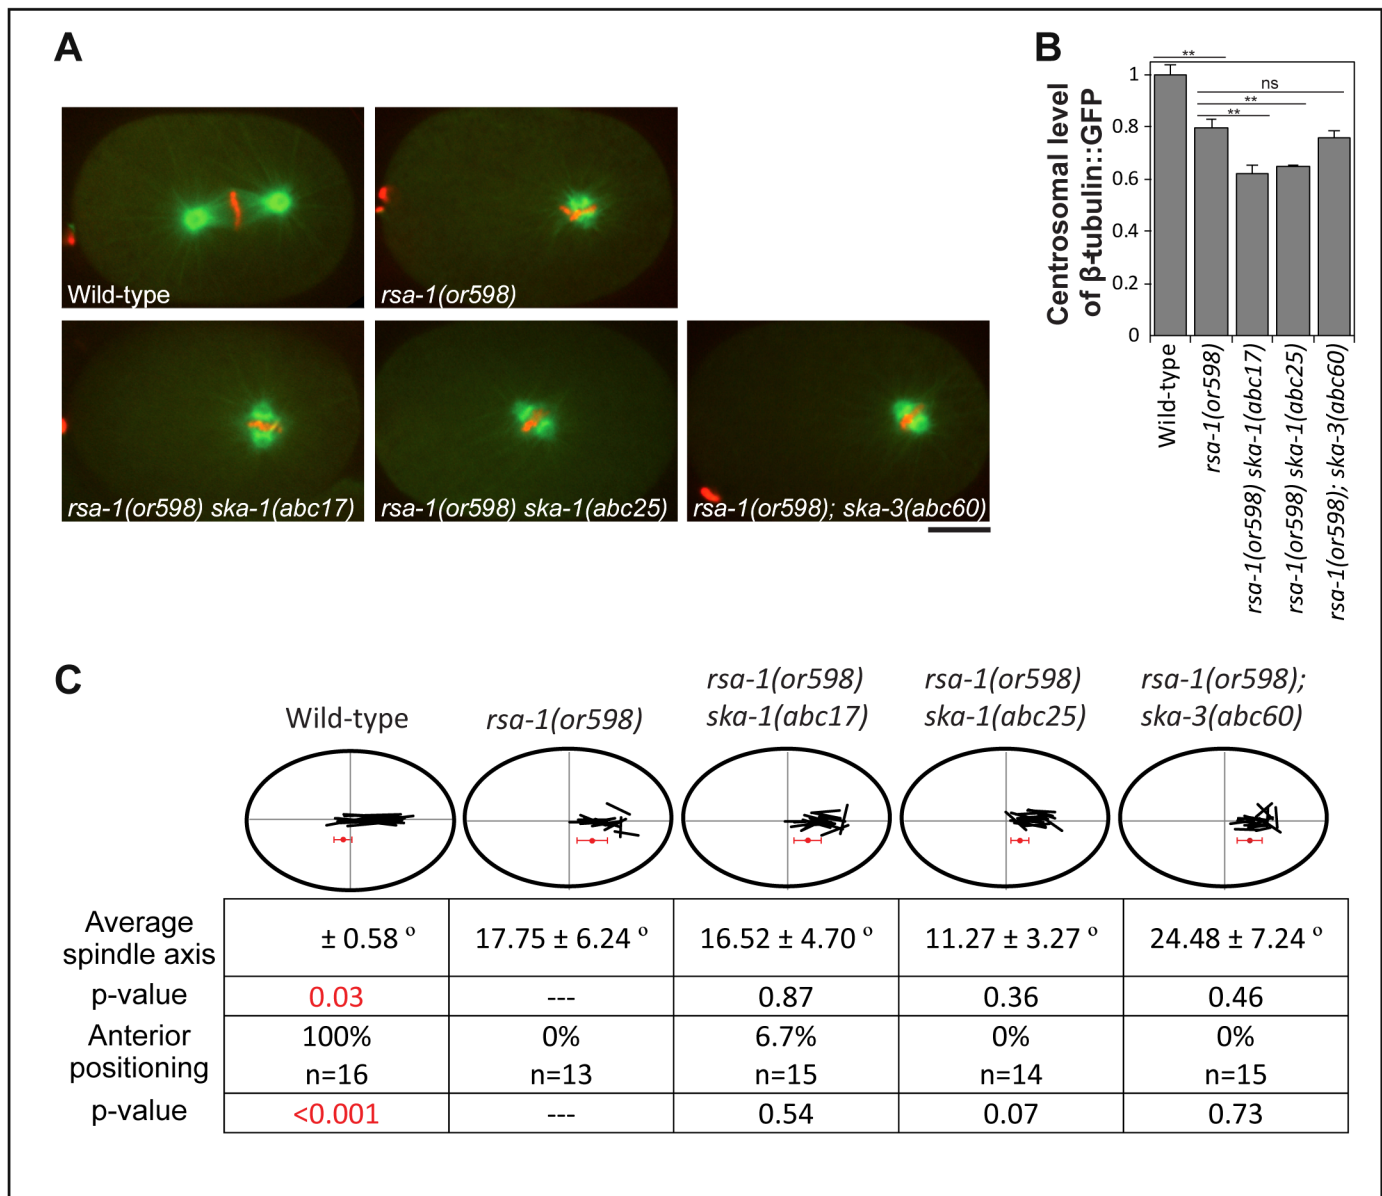

**Figure S3. Ska mutations do not restore microtubule levels in *rsa-1(or598)* embryos**

A) Representative metaphase embryos expressing GFP::tubulin and mCherry::histone for each genotype are shown. Scale bar is 10  $\mu$ m.

B) Quantification of centrosomal levels of tubulin in wild-type and mutant embryos. *rsa-1(or598)* exhibited a significant decrease in microtubules at the centrosome compared to wild type, and the suppressor mutations did not rescue this phenotype. WT (n=15), *rsa-1(or598)* (n=10), *rsa-1(or598) ska-1(abc17)* (n=16), *rsa-1(or598) ska-1(abc25)* (n=13), *rsa-1(or598) ska-3(abc60)* (n=11). \*\* indicates a  $P \leq 0.01$  using a two-tailed Student's T-test.

C) Metaphase spindle positioning in wild-type, *rsa-1(or598)*, and Ska suppressor mutants. All measurements represent 10 seconds prior to anaphase onset. The average spindle axis is relative to the long axis of the embryo. Spindle position was measured relative to the center of each embryo. Red dot with error bars represents average anterior centrosome position along the axis of the embryo. The Ska suppressor mutations do not rescue the spindle-positioning defects associated with *rsa-1(or598)*. P-values were calculated relative to *rsa-1(or598)*, using a two-tailed Student's T-test.
