# Supplementary material
Source: publisher figshare collection journal article supplement (https://gsajournals.figshare.com/articles/dataset/_/8031848)
Supplement: Supplementary file 4 [file 1]

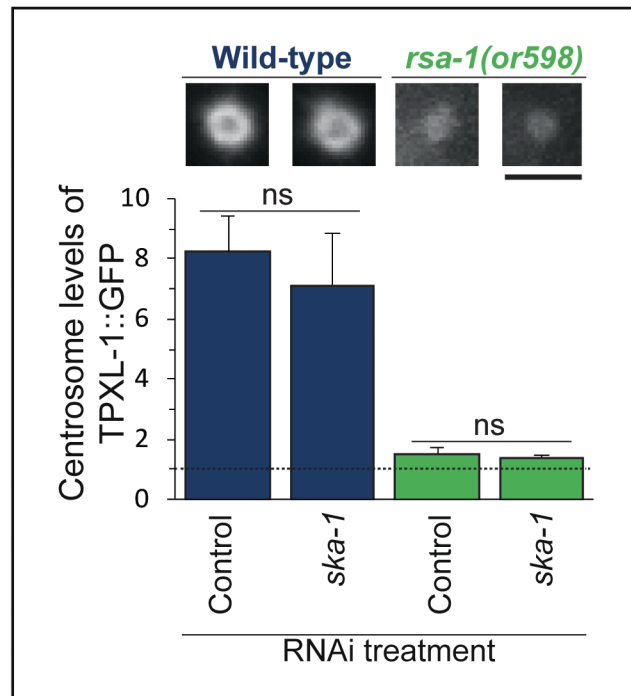

**Figure S4. TPXL-1 microtubule stabilizer protein levels are not significantly affected by Ska depletion**

Centrosomal levels of TPXL-1::GFP, relative to cytoplasmic levels, are shown. In otherwise wild-type embryos, *ska-1(RNAi)* (n=14) did not significantly affect centrosomal levels of TPXL-1::GFP relative to controls (n=16; P=0.052). *rsa-1(or598)* embryos (n=14) exhibit lower centrosomal TPXL-1 fluorescence levels than wild-type, however, *ska-1(RNAi)* did not further change TPXL-1 fluorescence (n=10; P=0.075). Dashed line indicates cytoplasmic levels of TPXL-1. Scale bar is 5  $\mu$ m. Error bars are SEM.
