# Supplementary material
Source: publisher figshare collection journal article supplement (https://gsajournals.figshare.com/articles/dataset/_/8031848)
Supplement: Supplementary file 5 [file 1]

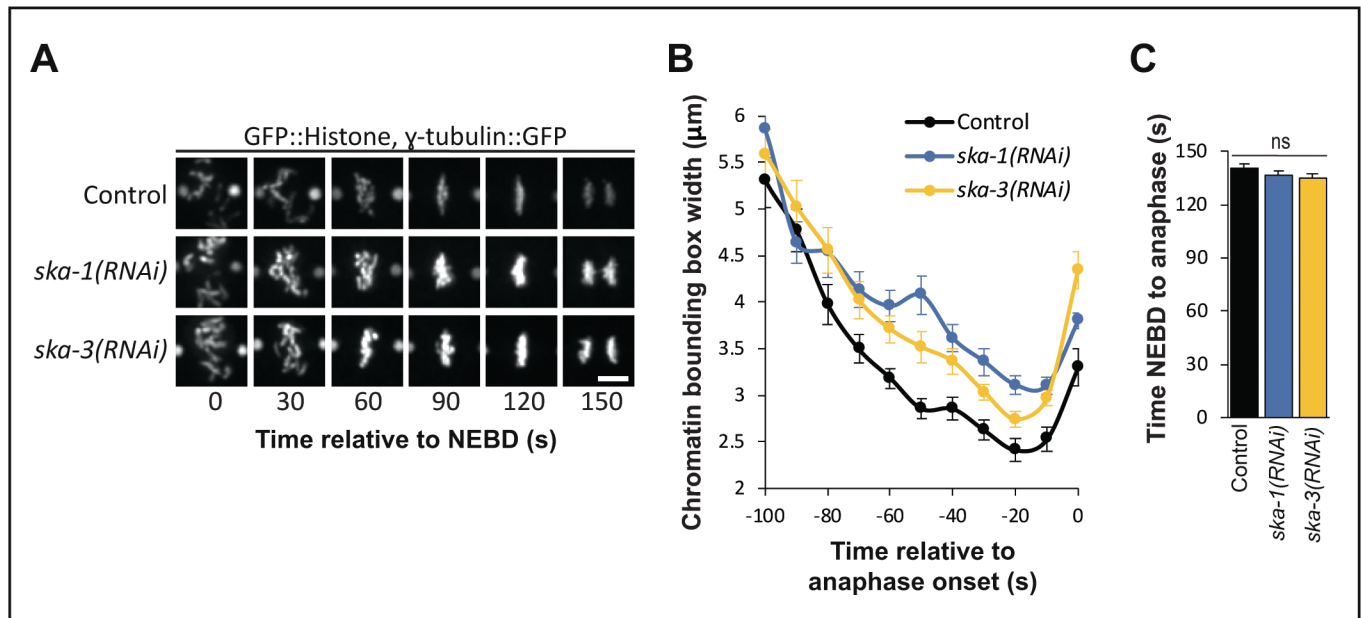

**Figure S5. The Ska complex is required for tight metaphase plate formation.**

A) Chromosome dynamics during mitosis were recorded in control, *ska-1(RNAi)* or *ska-3(RNAi)* embryos. The strain expresses GFP-histone (chromatin) and  $\gamma$ -tubulin-GFP (centrosomes, visible in some panels). Scale bar is 5  $\mu\text{m}$ .

B) To measure chromosome alignment, a bounding box was drawn around the chromatin and the width of the box was calculated at each time-point. As chromosomes congressed during prophase and metaphase, the width of the box decreased. *ska-1(RNAi)* and *ska-3(RNAi)* embryos exhibited chromosome alignment defects compared to control embryos. For *ska-1(RNAi)*,  $P=0.002$ ; for *ska-3(RNAi)*,  $P=0.01$ , at 10 seconds prior to anaphase onset, using a two-tailed Student's T-test. Error bars are SEM ( $n=12$  embryos for each).

C) The time from nuclear envelope breakdown to anaphase onset was measured in control ( $n=30$ ), *ska-1(RNAi)* ( $n=16$ ), and *ska-3(RNAi)* ( $n=13$ ) embryos. Depletion of the Ska complex alone did not cause significant cell-cycle delays during spindle assembly in one-cell embryos compared to wild type; *ska-1(RNAi)* ( $P=0.31$ ), *ska-3(RNAi)* ( $P=0.78$ ), using a two-tailed Student's T-test.
