# Supplementary material
Source: publisher figshare collection journal article supplement (https://gsajournals.figshare.com/articles/dataset/_/8031848)
Supplement: Supplementary file 7 [file 1]

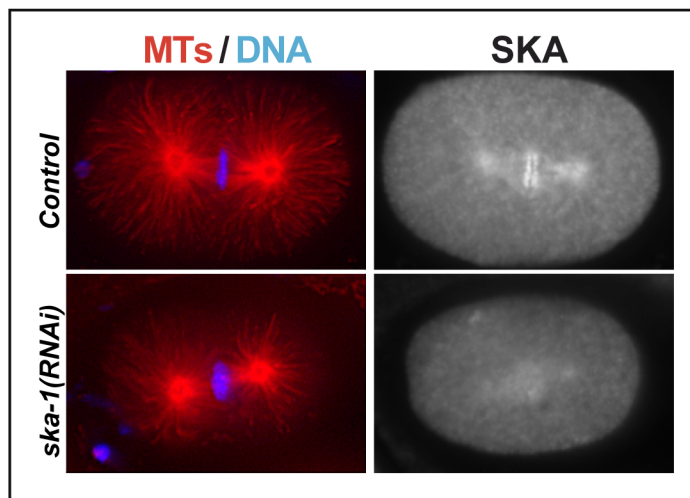

**Figure S1. *ska-1(RNAi)* resulted in a reduction of Ska immunofluorescence in the one-cell embryo.**

Fixed one-cell embryos were stained with DAPI (DNA) and immuno-labelled with anti-tubulin antibodies (microtubules, MT) and anti-Ska antibodies (see Materials and Methods). *ska-1(RNAi)* caused a clear reduction of Ska immunofluorescence, mostly at kinetochores and centrosomes, but a faint signal was detected throughout the spindle, as shown.
